# Supplementary material for: IL-2 produced by HBV-specific T cells as a biomarker of viral control and predictor of response to PD-1 therapy across clinical phases of chronic hepatitis B
Source: PubMed Central journal article supplement (PMC10984660; doi:10.1097/hc9.0000000000000337), 2023-12-07

**Figure 1. Ex vivo detection of HBV-specific T cells in CHB patient cohorts via multi-analyte FluoroSpot assays**

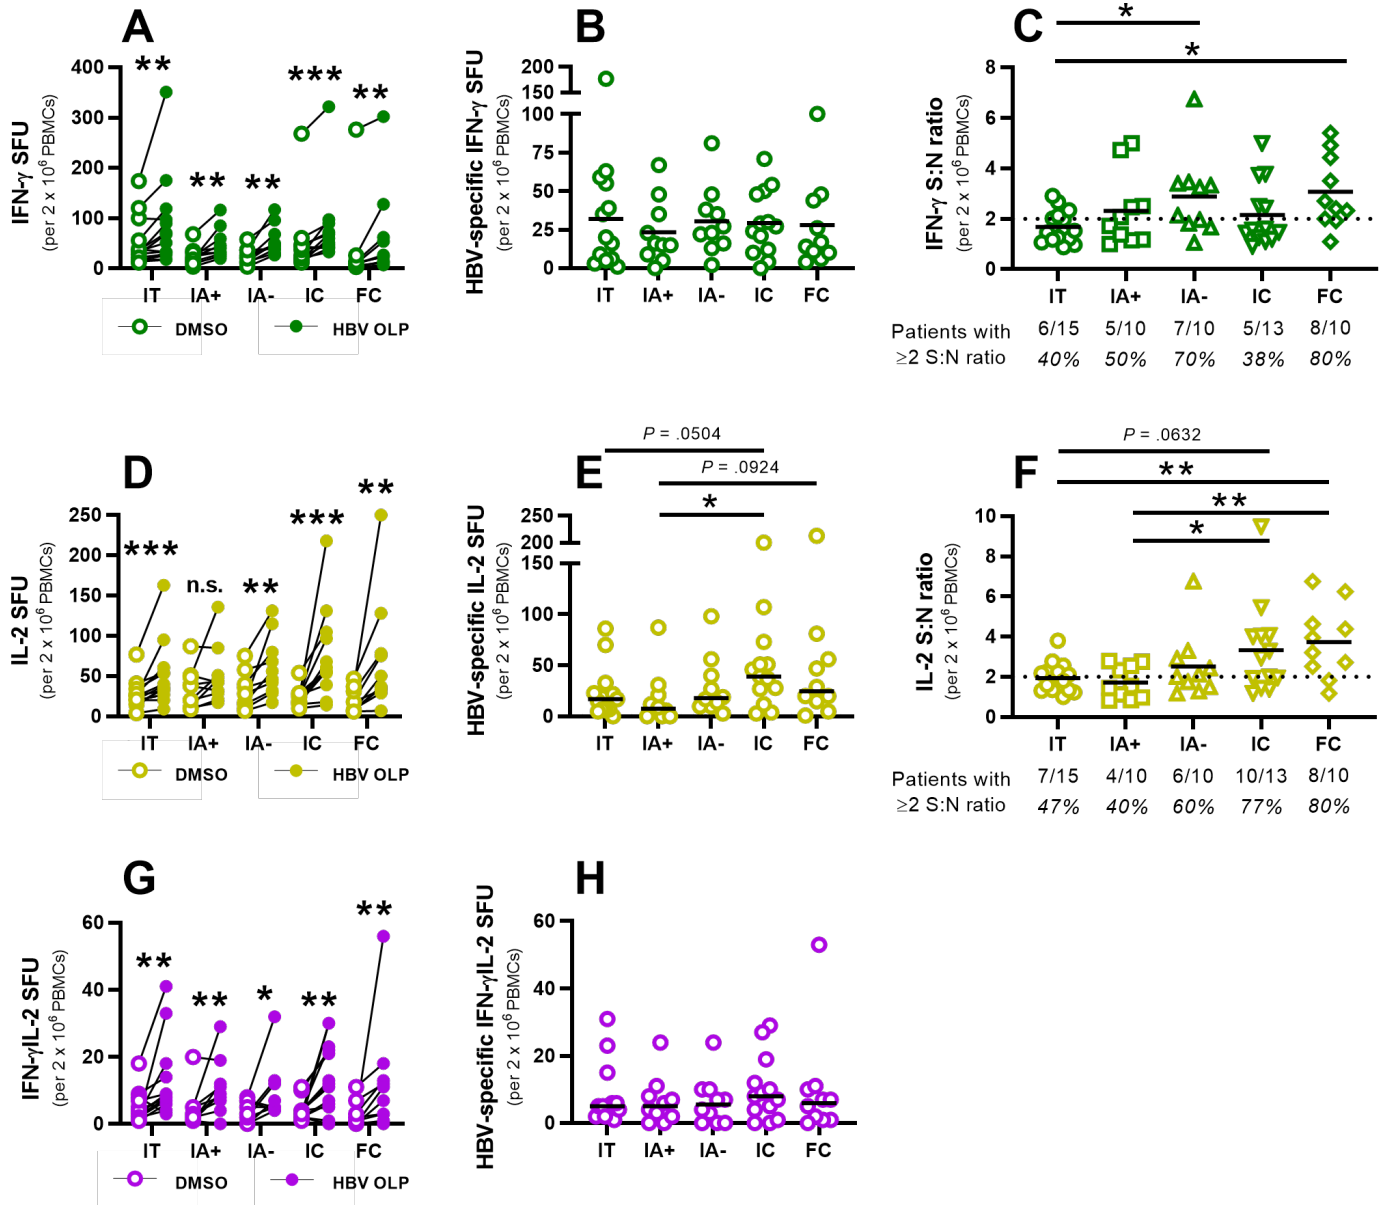

**Figure 2. Ex vivo  $\alpha$ -PD-1 blocking leads to functional restoration of HBV-specific T cells among CHB patients**

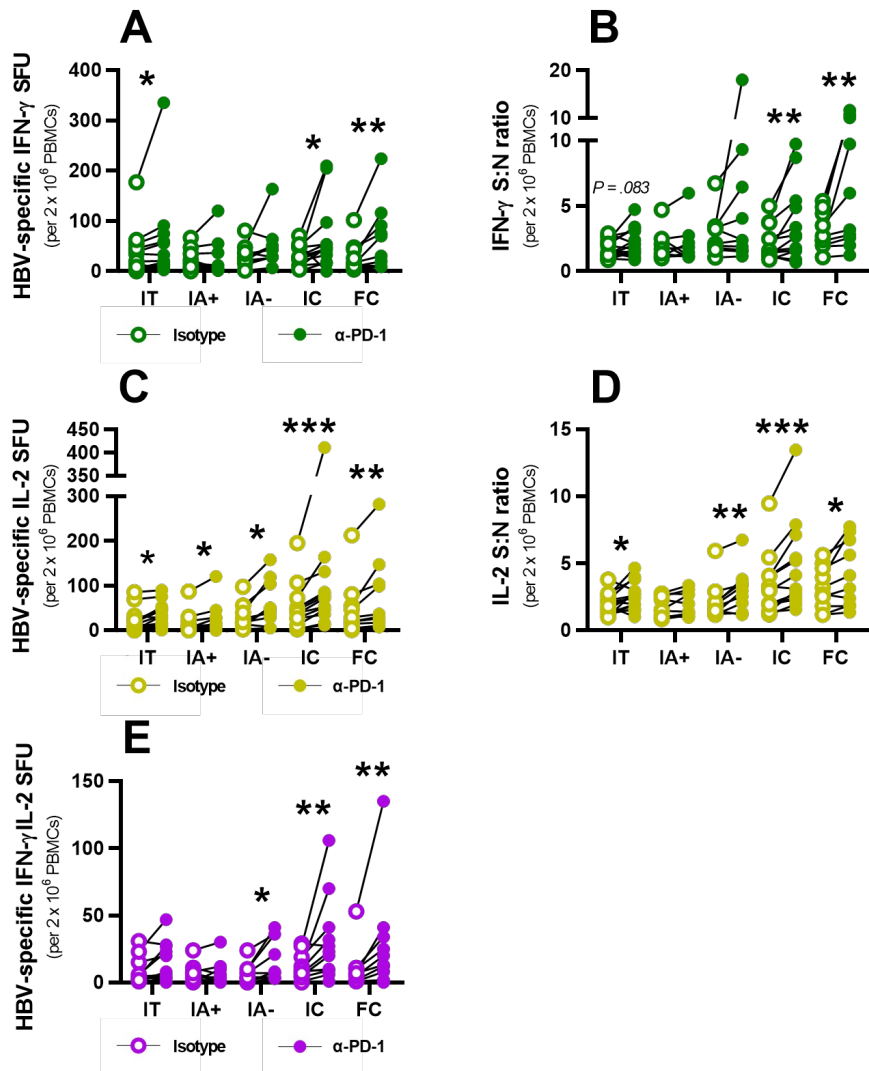

Figure 3. Functional restoration from ex vivo PD-1 blockade across CHB patient cohorts.

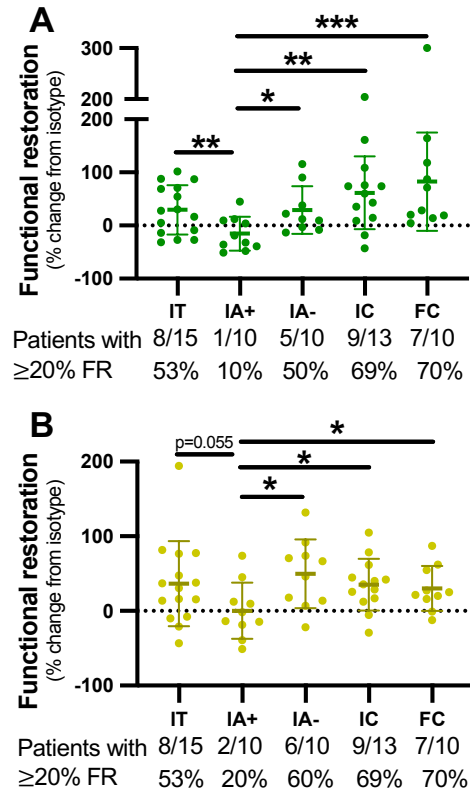

Figure 4. Liver biopsy stains for PD-1/PD-L1 across CHB patient cohorts.

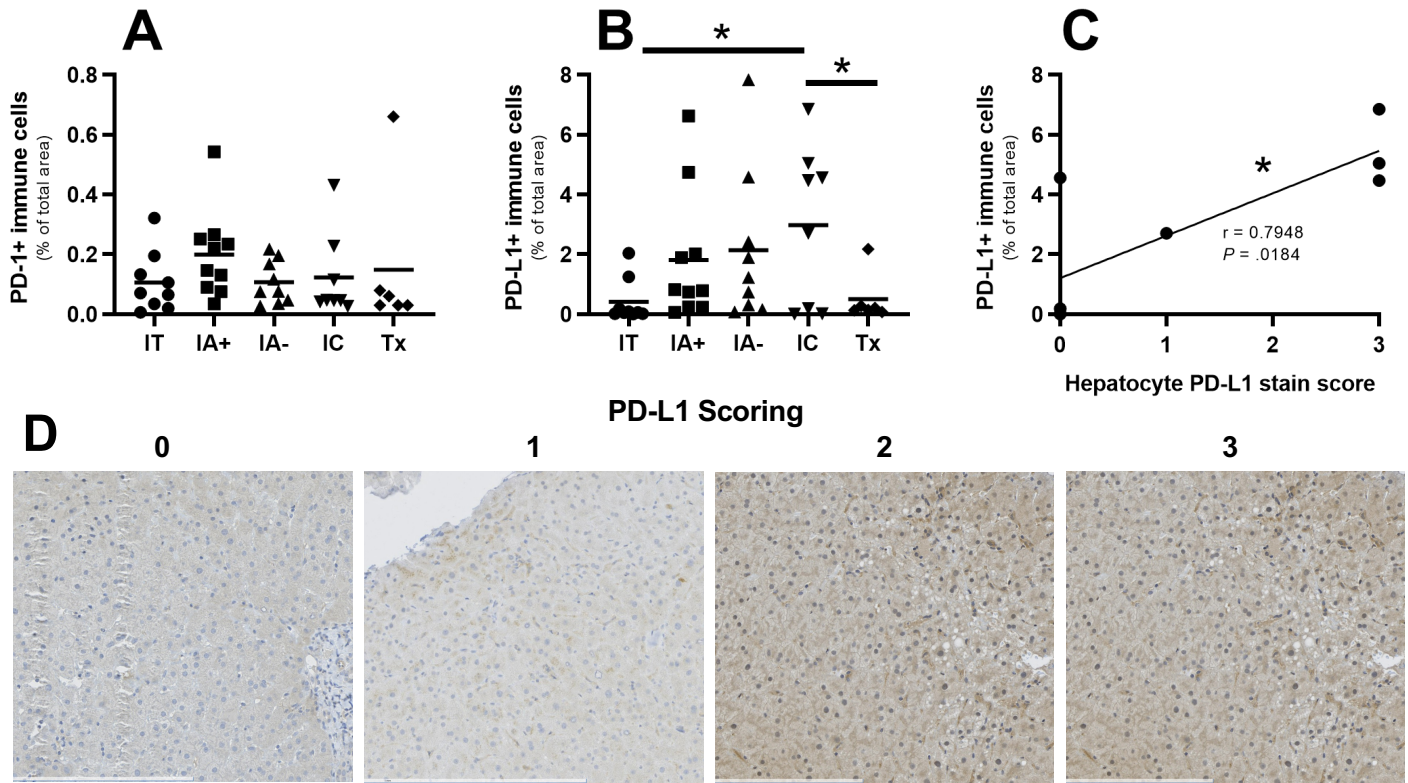

**Figure 5. Ex vivo HBV antigen hierarchies are distinct between CHB phase**

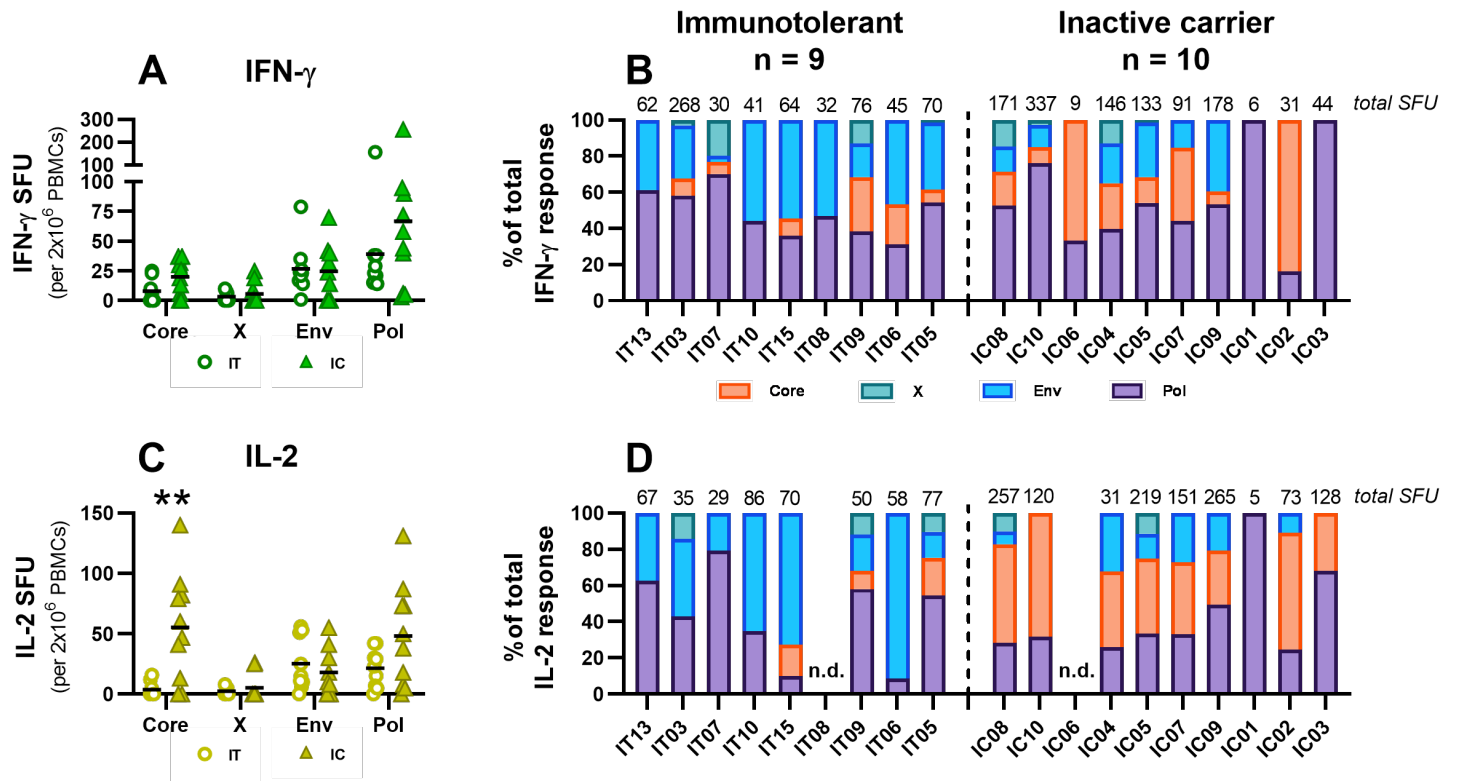

**Figure 6. Differential functional restoration of HBV antigen-specific T cell responses by clinical phase and cytokine response**

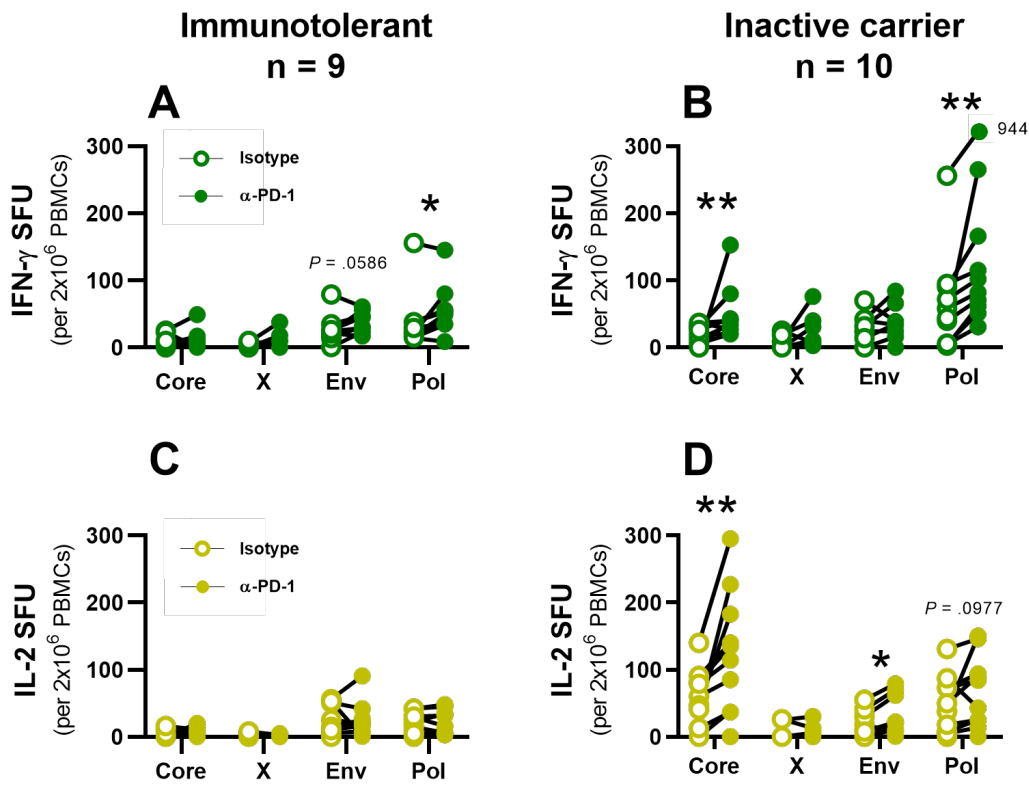

**Figure 7. IFN response capacity correlates with IL-2 restoration after PD-1 blockade**

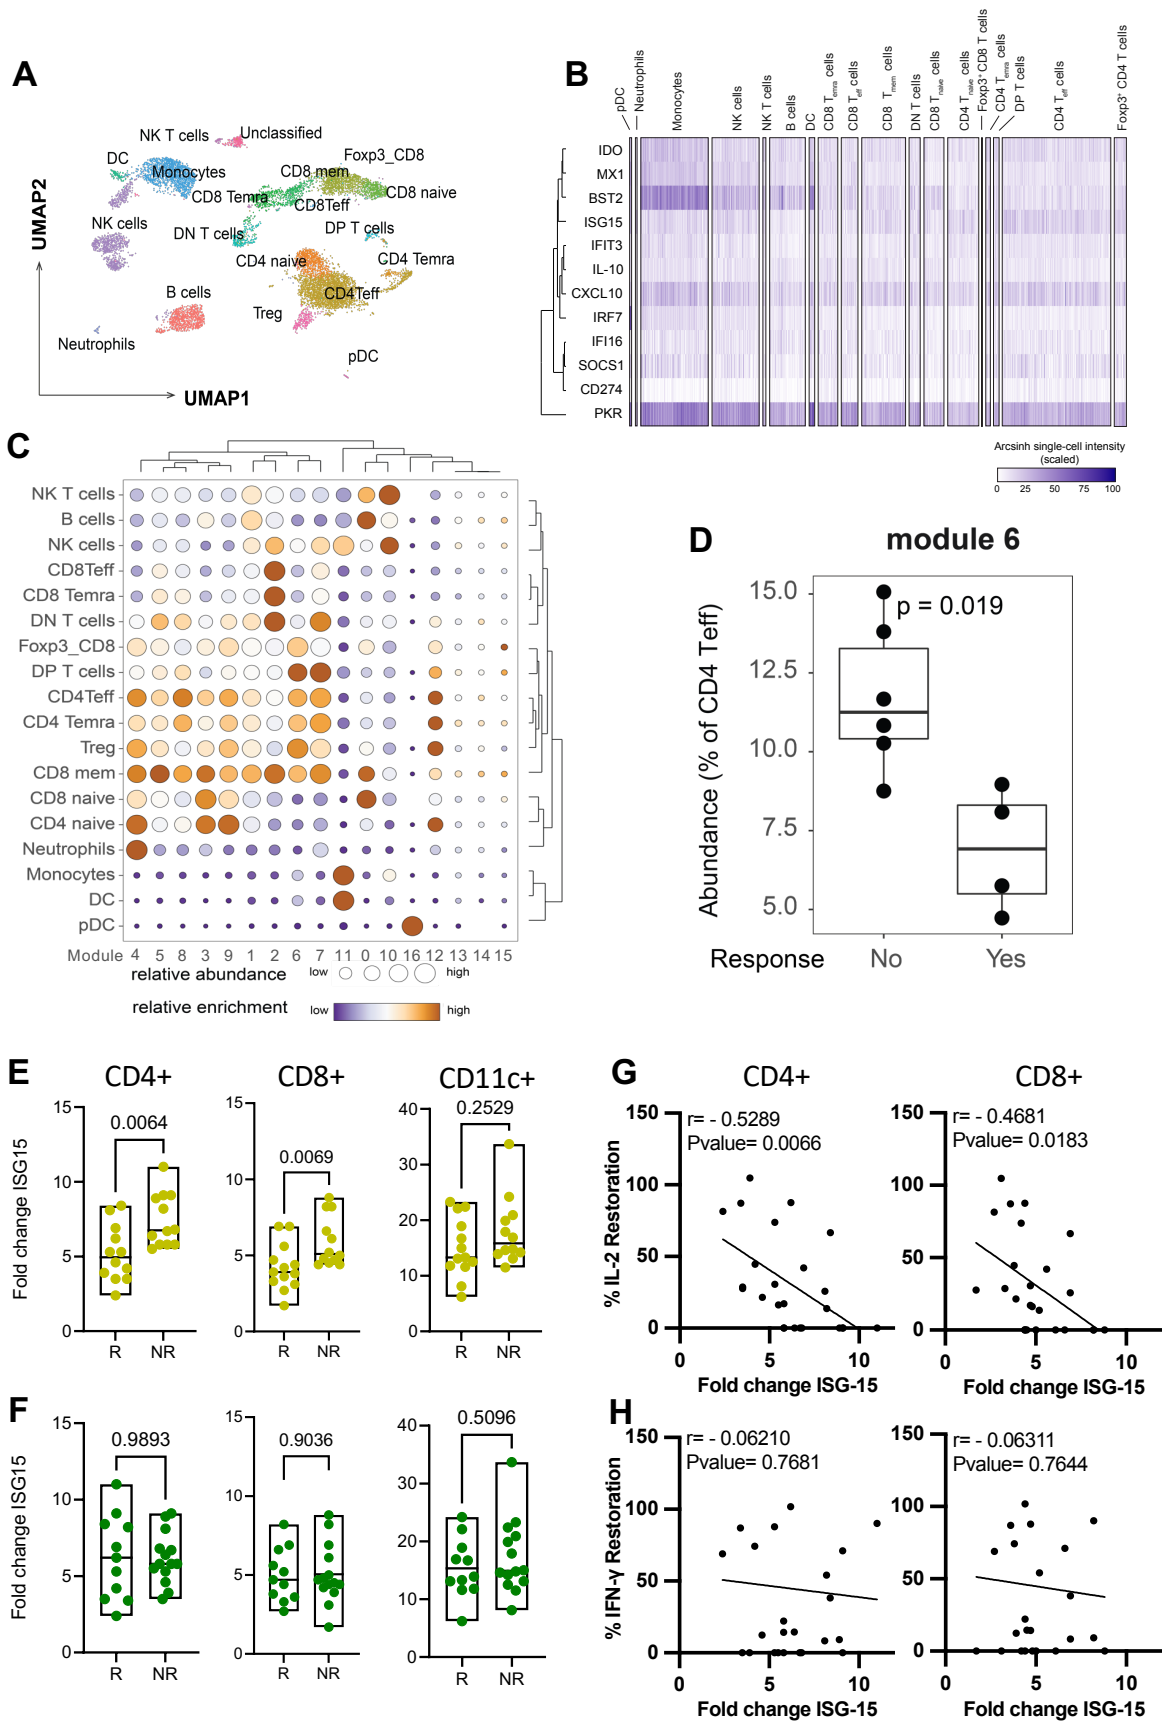

## Supplementary Table 1. Chronic HBV patient PBMC cohort characteristics:

| Variables                            | IT                    | IA+                   | IA-                   | IC                    | FC              |
|--------------------------------------|-----------------------|-----------------------|-----------------------|-----------------------|-----------------|
| Number of patients                   | 15                    | 10                    | 10                    | 13                    | 10              |
| Age (year),<br>median (IQR)          | 41<br>(36 - 51)       | 32<br>(28 - 39)       | 41<br>(37 - 51)       | 50<br>(43 - 56)       | 62<br>(57 - 66) |
| Males (Females)                      | 3 (12)                | 7 (3)                 | 5 (5)                 | 6 (7)                 | 4 (6)           |
| HBsAg (log IU/mL),<br>median (IQR)   | 4.91<br>(4.75 – 5.00) | 4.62<br>(4.00 – 4.96) | 3.39<br>(3.02 – 3.62) | 3.04<br>(2.16 – 3.68) | -               |
| HBV DNA (log IU/mL),<br>median (IQR) | 8.42<br>(8.23 – 8.72) | 8.28<br>(7.67 – 8.54) | 6.00<br>(5.64 – 7.28) | 1.87<br>(1.00 – 2.82) | -               |
| ALT (U/L),<br>median (IQR)           | 24<br>(22 – 31)       | 73<br>(67 - 102)      | 102<br>(74.5 – 304)   | 24.5<br>(19 – 27)     | 22<br>(19 - 24) |

IT: Immunotolerant; IA+: HBeAg+ immune-active disease; IA-: HBeAg- immune-active disease; IC: inactive carrier; FC: functionally cured



## Supplementary Table 2. Chronic HBV patient Biopsy cohort characteristics:

| Variables                            | IT                 | IA+                | IA-                | IC                 | Tx                 |
|--------------------------------------|--------------------|--------------------|--------------------|--------------------|--------------------|
| Number of patients                   | 9                  | 10                 | 9                  | 8                  | 6                  |
| Age (year),<br>median (IQR)          | 32<br>(26 - 36)    | 39<br>(28 - 49)    | 34<br>(30 - 50)    | 41<br>(37 - 42)    | 45<br>(39 - 59)    |
| Males (Females)                      | 5 (4)              | 7 (3)              | 6 (3)              | 6 (2)              | 5 (1)              |
| HBV DNA (log IU/mL),<br>median (IQR) | 8.6<br>(8.3 – 8.8) | 8.2<br>(7.5 – 8.4) | 5.7<br>(5.3 – 7.0) | 2.1<br>(1.4 – 2.5) | 2.7<br>(2.1 – 3.0) |
| ALT (U/L),<br>median (IQR)           | 31<br>(21 - 38)    | 148<br>(90 - 175)  | 131<br>(106 - 180) | 27<br>(24 - 36)    | 31<br>(23 - 60)    |

IT: Immunotolerant; IA+: HBeAg+ immune-active disease; IA-: HBeAg- immune-active disease; IC: inactive carrier; Tx: on antiviral treatment

**Supplementary figure 1. DMSO background was not significantly different upon PD-1 blockade**

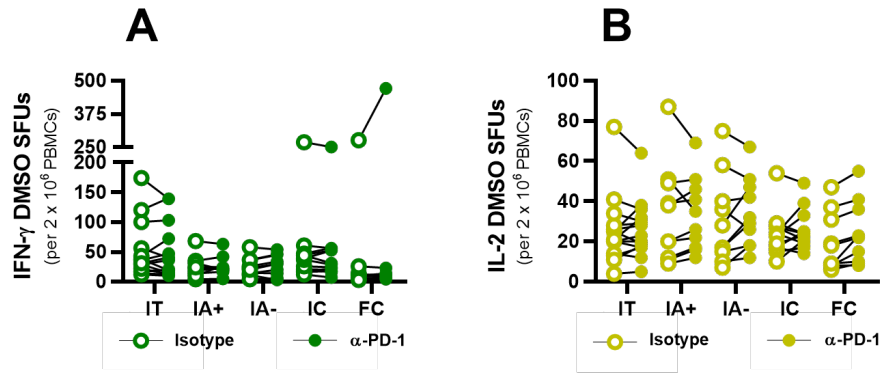

## Supplementary figure 2. Env-specific T cell frequencies do not correlate with patient age

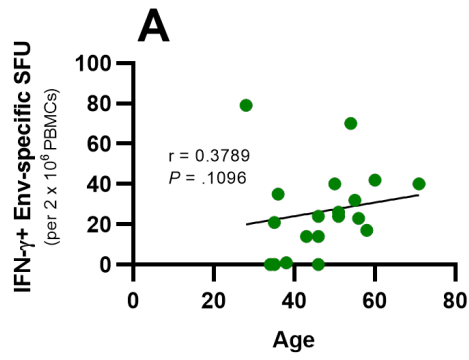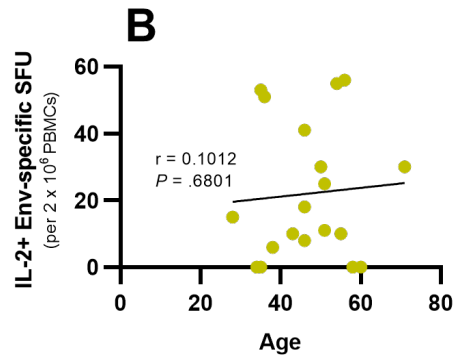

### Supplementary figure 3. Ex vivo intracellular cytokine staining for IL-2 in HBV-specific CD4 and CD8 T cells.

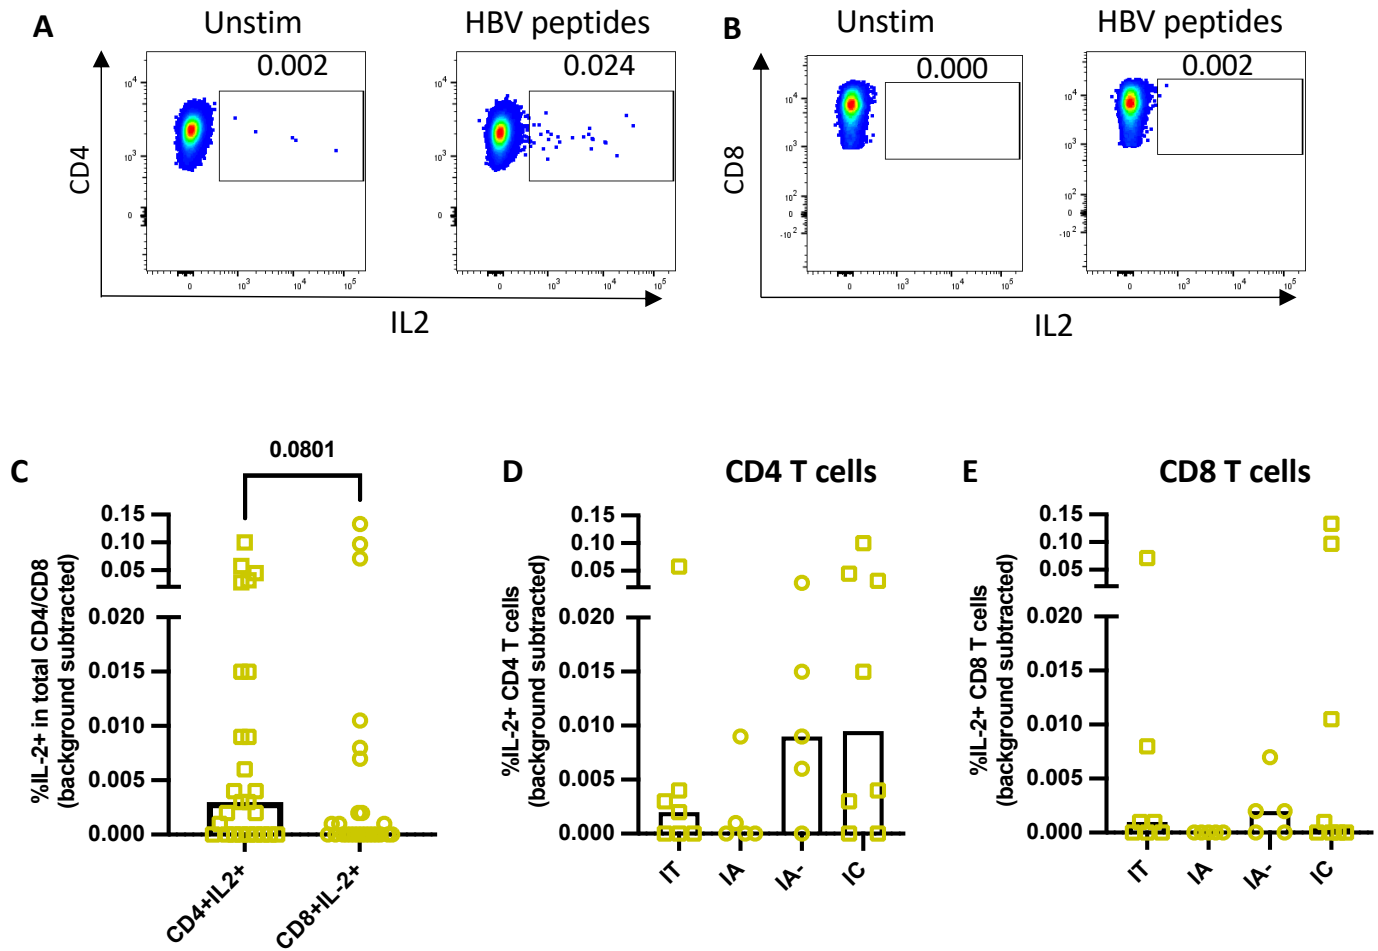

# Supplemental Fig 4. ISP modules and expression between CHB patients with increased IL-2 response vs. non-responders

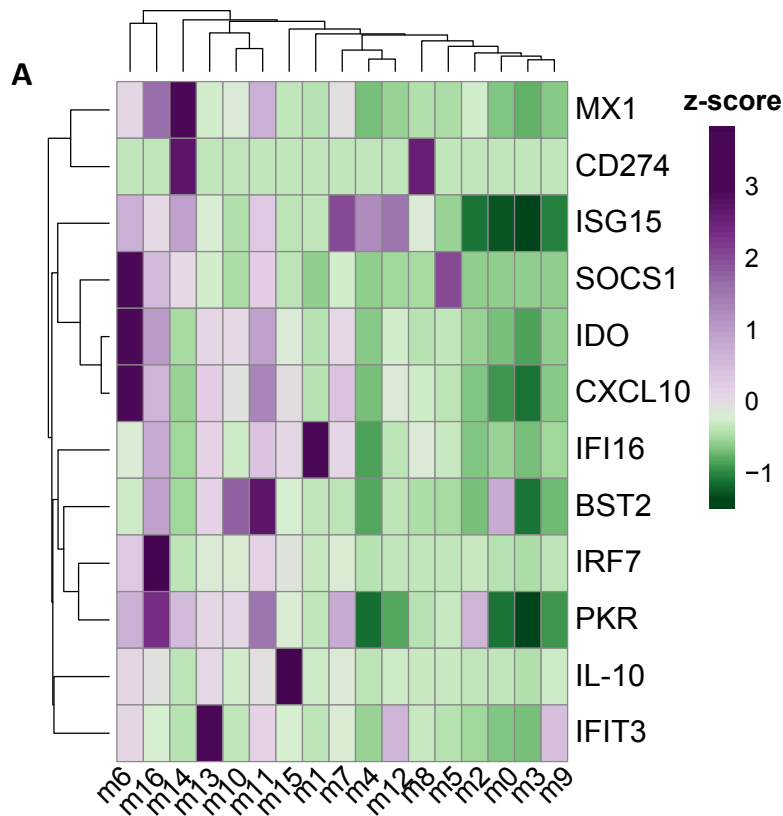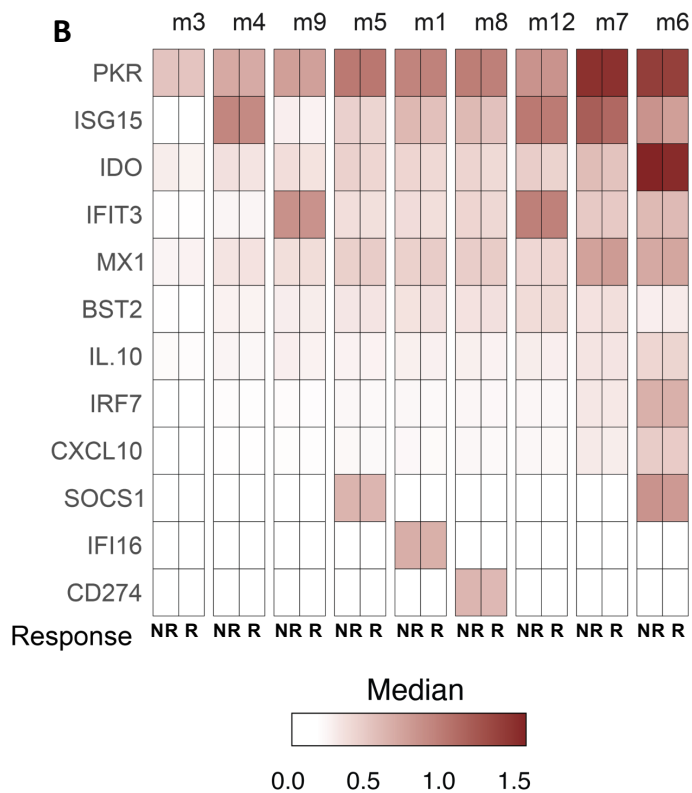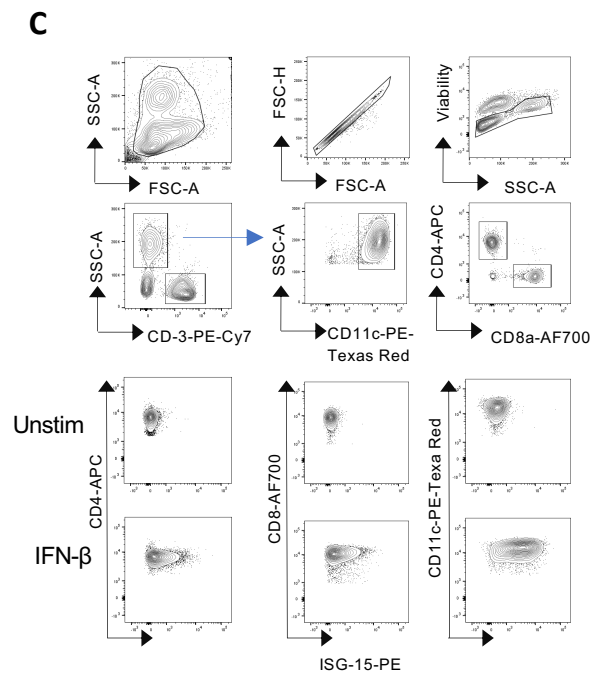

Supplement: hc9-7-e0337-s001.pdf [file hc9-7-e0337-s001.pdf]
